# Supplementary material for: Design of mass-controllable NiCo2S4/Ketjen Black nanocomposite electrodes for high performance supercapacitors
Source: Royal Society of Chemistry journal article supplement (doi:10.1039/c5ce01324k), 2015-01-01
Supplement: c5ce01324k1.pdf [file c5ce01324k1.pdf]

## Supporting Information

### **Design Mass-controllable NiCo<sub>2</sub>S<sub>4</sub>/Ketjen Black Nanocomposite Electrodes for High performance Supercapacitors**

Tao Peng,<sup>a</sup> Tieliang Zhao,<sup>b</sup> Qing Zhou,<sup>c</sup> Hongyan Zhou,<sup>c</sup> Jun Wang,<sup>\*a</sup> Jinyuan Liu,<sup>a</sup> Qi Liu<sup>a</sup>

<sup>a</sup> Key Laboratory of Superlight Material and Surface Technology, Ministry of Education, Harbin Engineering University, 150001, PR China. E-mail: junwang@hrbeu.edu.cn. Tel.: +86 451 8253 3026; Fax: +86 451 8253 3026;

<sup>b</sup> College of Mechanical and Electrical Engineering, Harbin Engineering University, 150001, PR China.

<sup>c</sup> Southwest University of Science and Technology, Mianyang, 621010, P.R.China

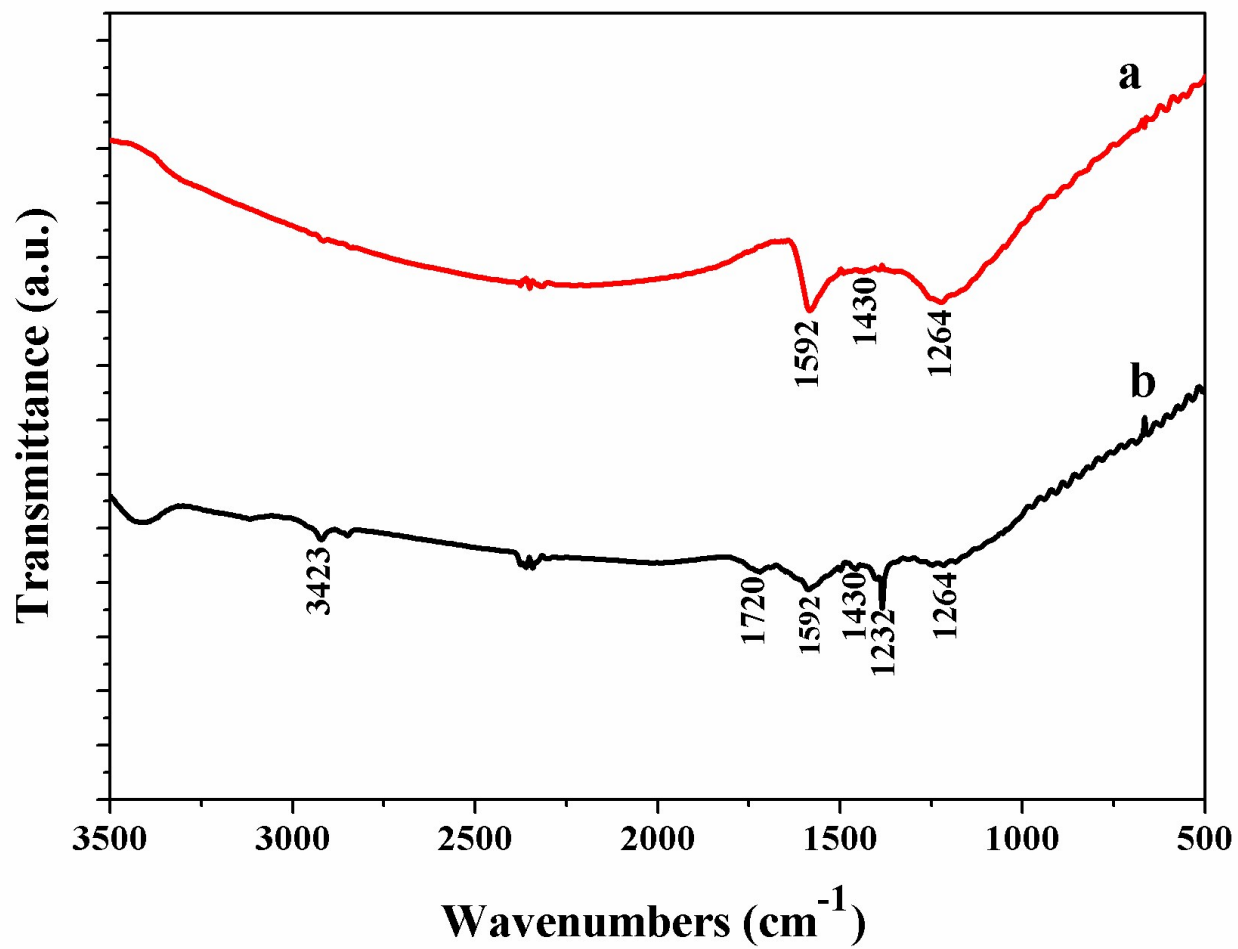

Fig.S1 The FT-IR spectrum of KB (a) and m-KB (b).

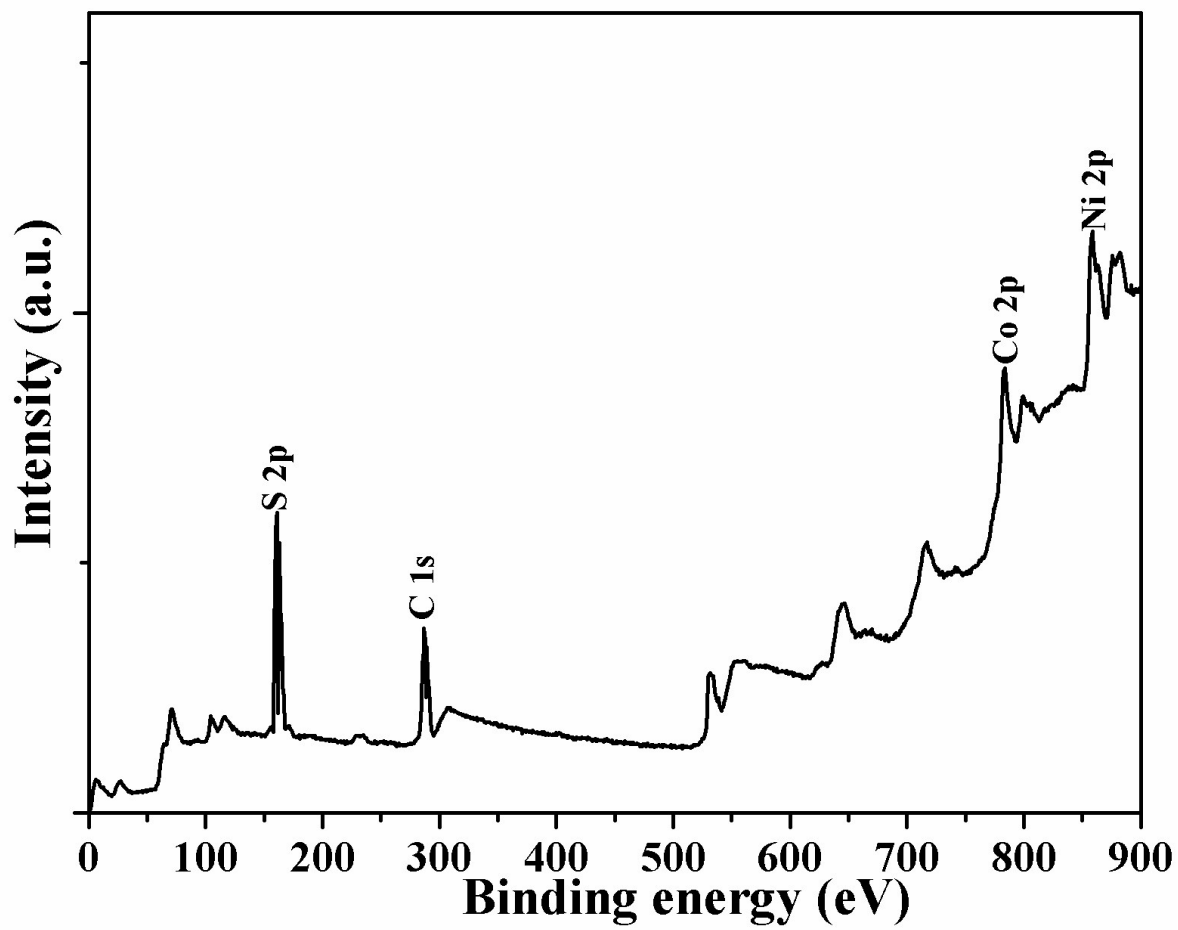

Fig. S2 XPS spectrum of the NiCo<sub>2</sub>S<sub>4</sub>/KB nanocomposite (survey spectrum)

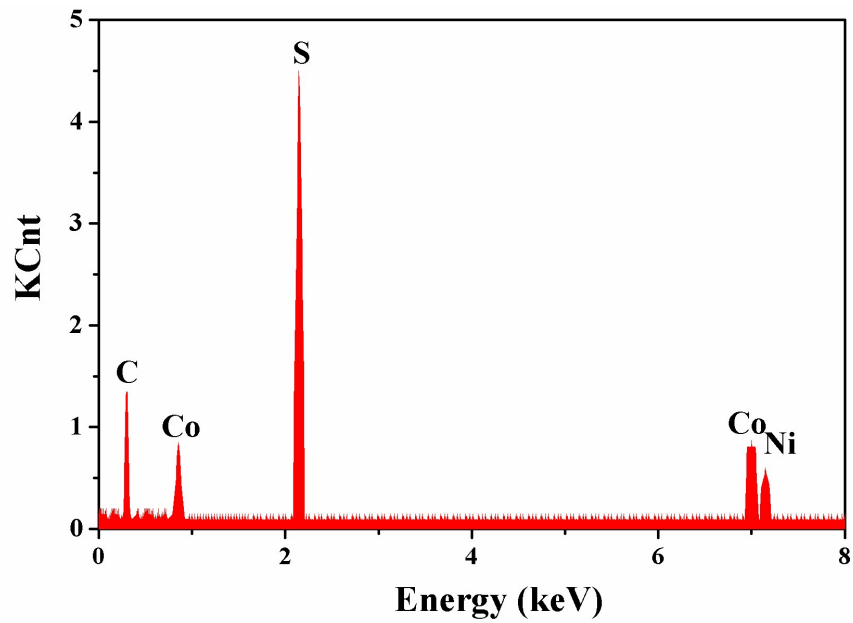

Fig.S3 EDS pattern of the NiCo<sub>2</sub>S<sub>4</sub>/KB nanocomposite in the section of g1 (Fig.3g).

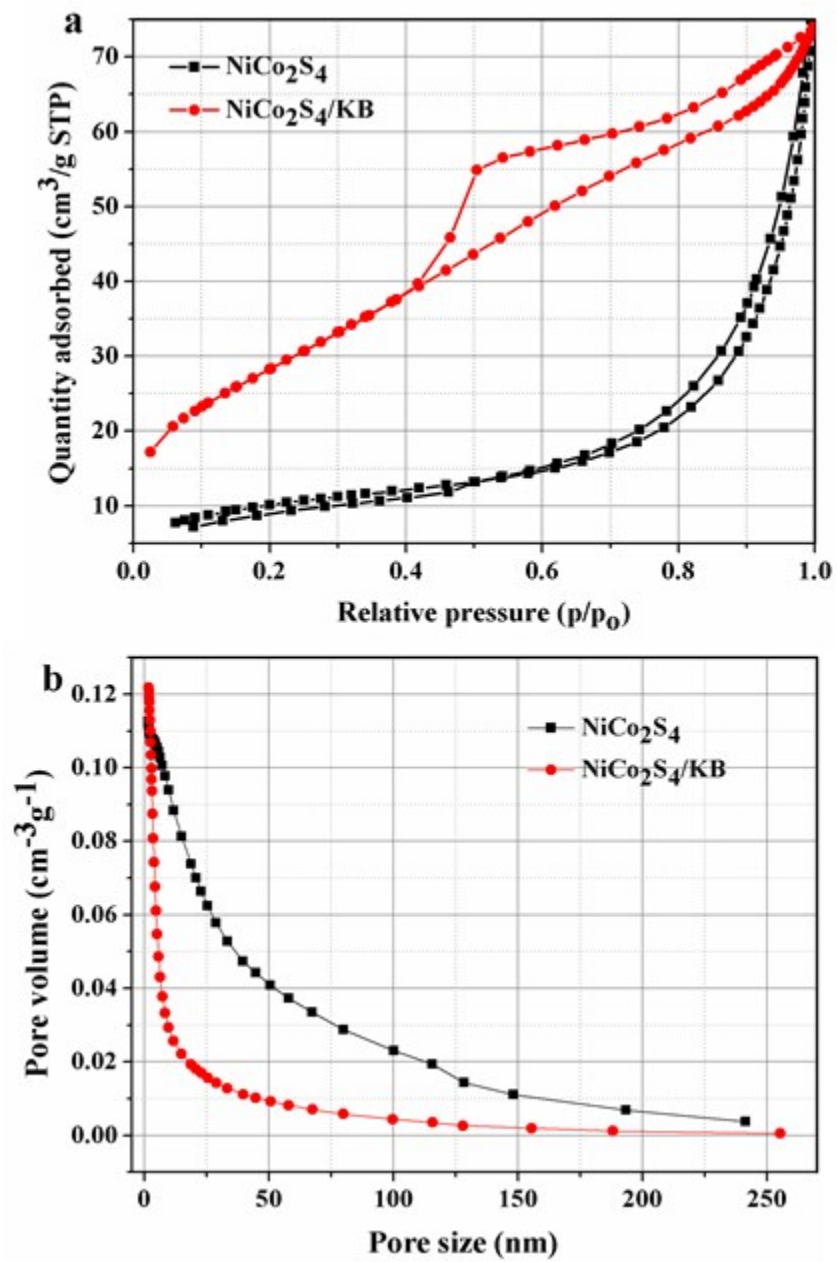

Fig.S4 (a)  $\text{N}_2$  adsorption-desorption isotherm and (b) the pore size distribution of  $\text{NiCo}_2\text{S}_4$  and  $\text{NiCo}_2\text{S}_4/\text{KB}$  composite

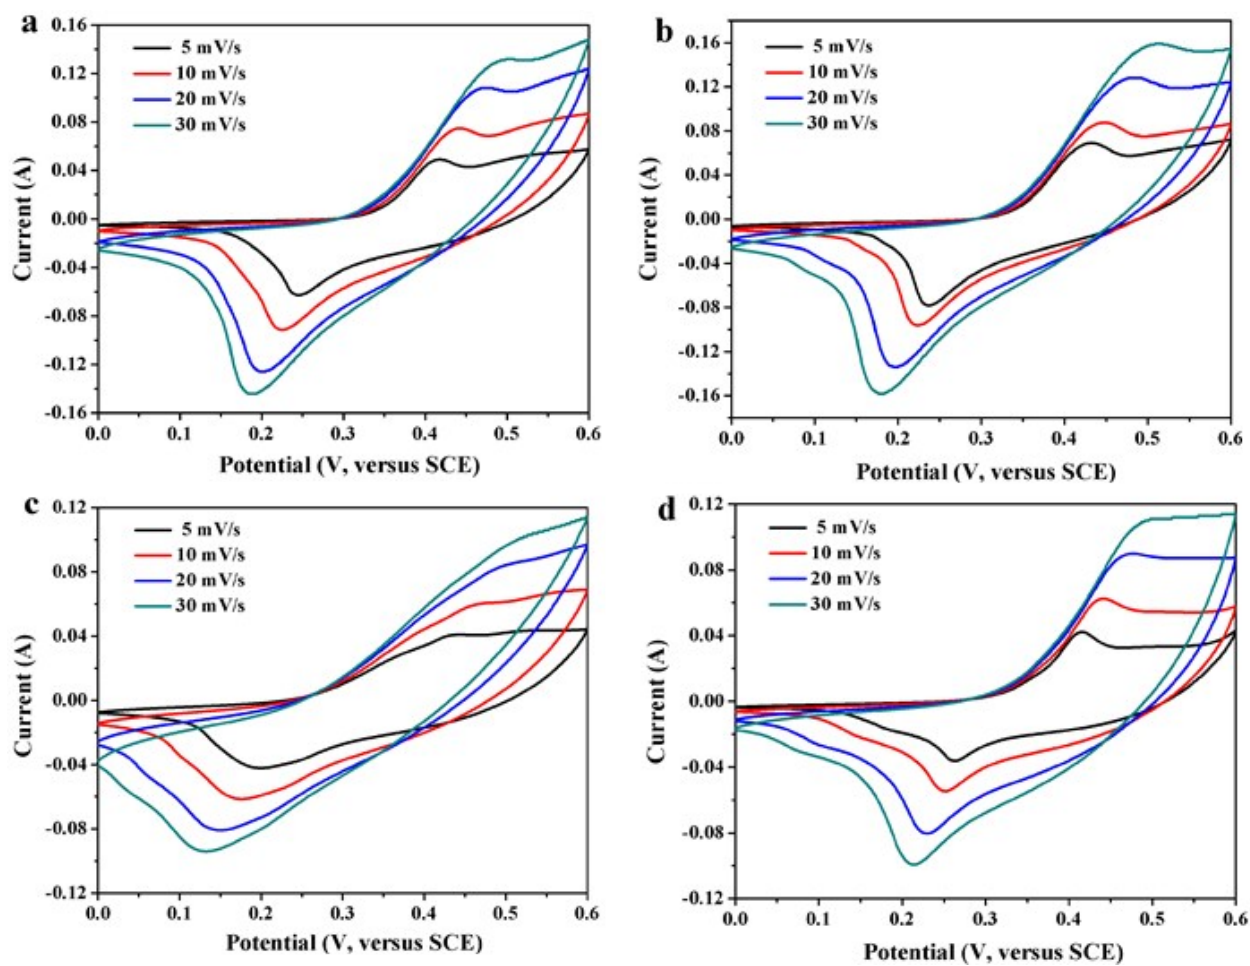

Fig.S5 CV spectrum of  $\text{Ni}_1\text{K}_{0.5}$ ,  $\text{Ni}_1\text{K}_{0.25}$ ,  $\text{Ni}_1\text{K}_{0.125}$  and  $\text{Ni}_1\text{K}_0$  at scan rates between 5 and 30  $\text{mV s}^{-1}$ , respectively

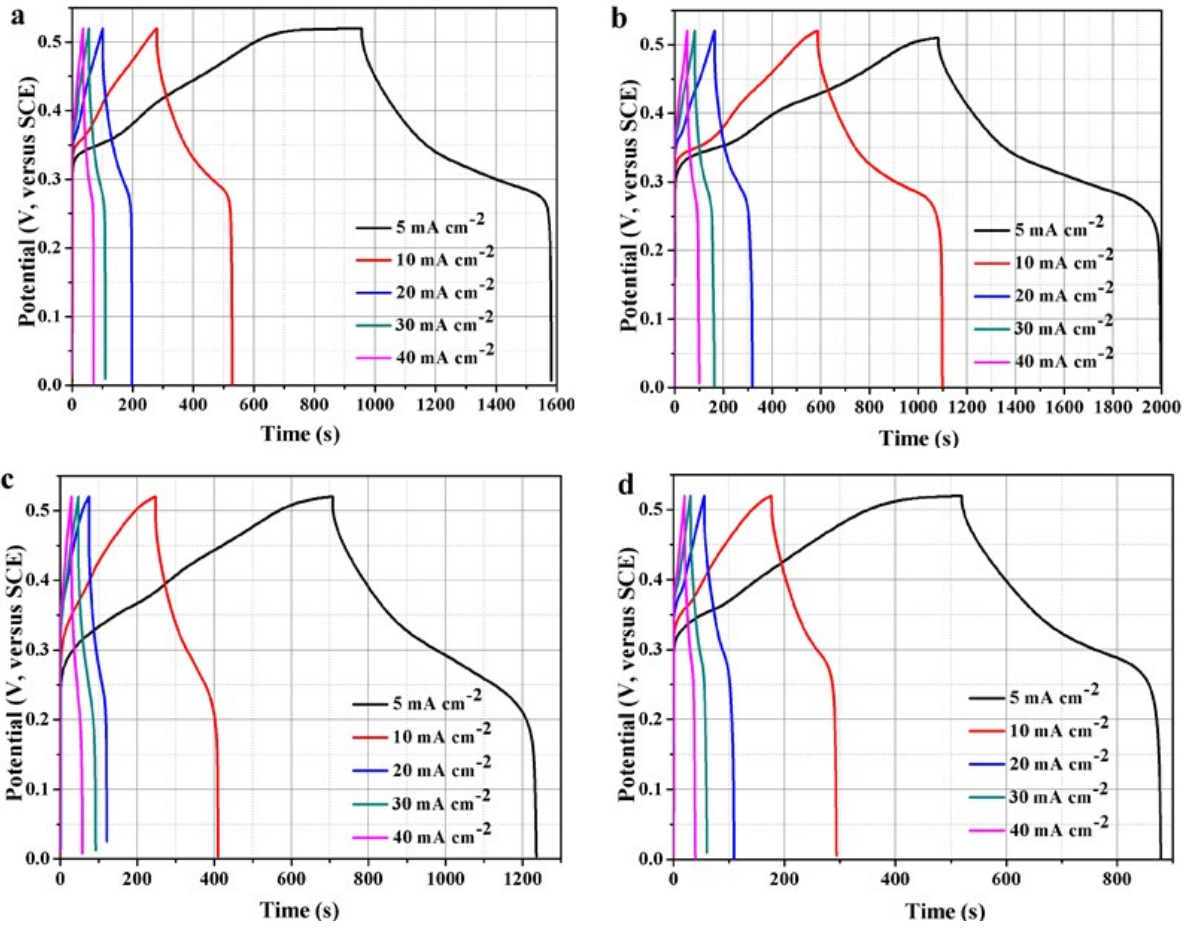

Fig.S6 Charge and discharge curves of  $\text{Ni}_1\text{K}_{0.5}$ ,  $\text{Ni}_1\text{K}_{0.25}$ ,  $\text{Ni}_1\text{K}_{0.125}$  and  $\text{Ni}_1\text{K}_0$  at current densities between 5 and 40 mA cm<sup>-2</sup>, respectively

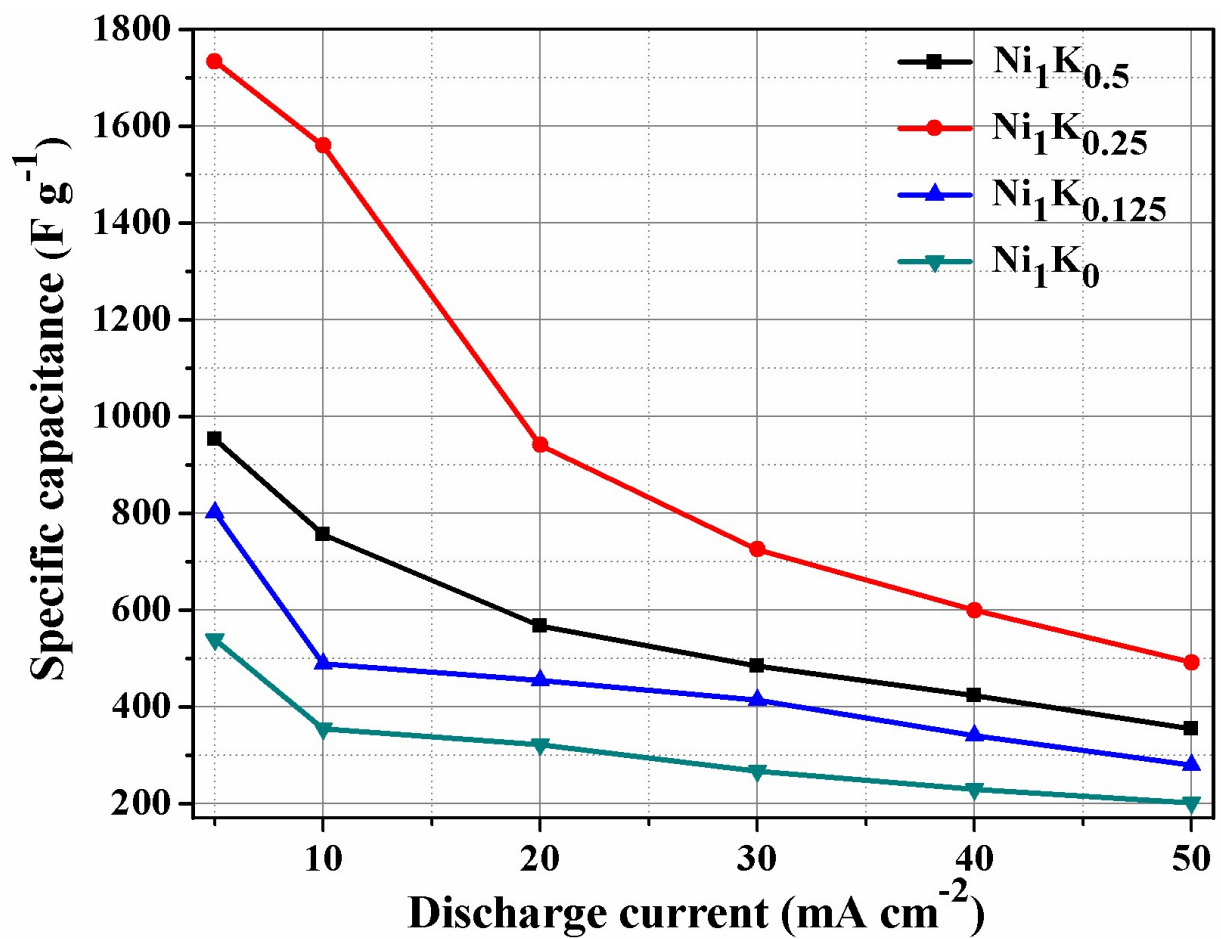

Fig.S7 Gravimetric specific capacitance of Ni<sub>1</sub>K<sub>0.5</sub>, Ni<sub>1</sub>K<sub>0.25</sub>, Ni<sub>1</sub>K<sub>0.125</sub> and Ni<sub>1</sub>K<sub>0</sub> at current densities between 5 and 50 mA cm<sup>-2</sup>, respectively



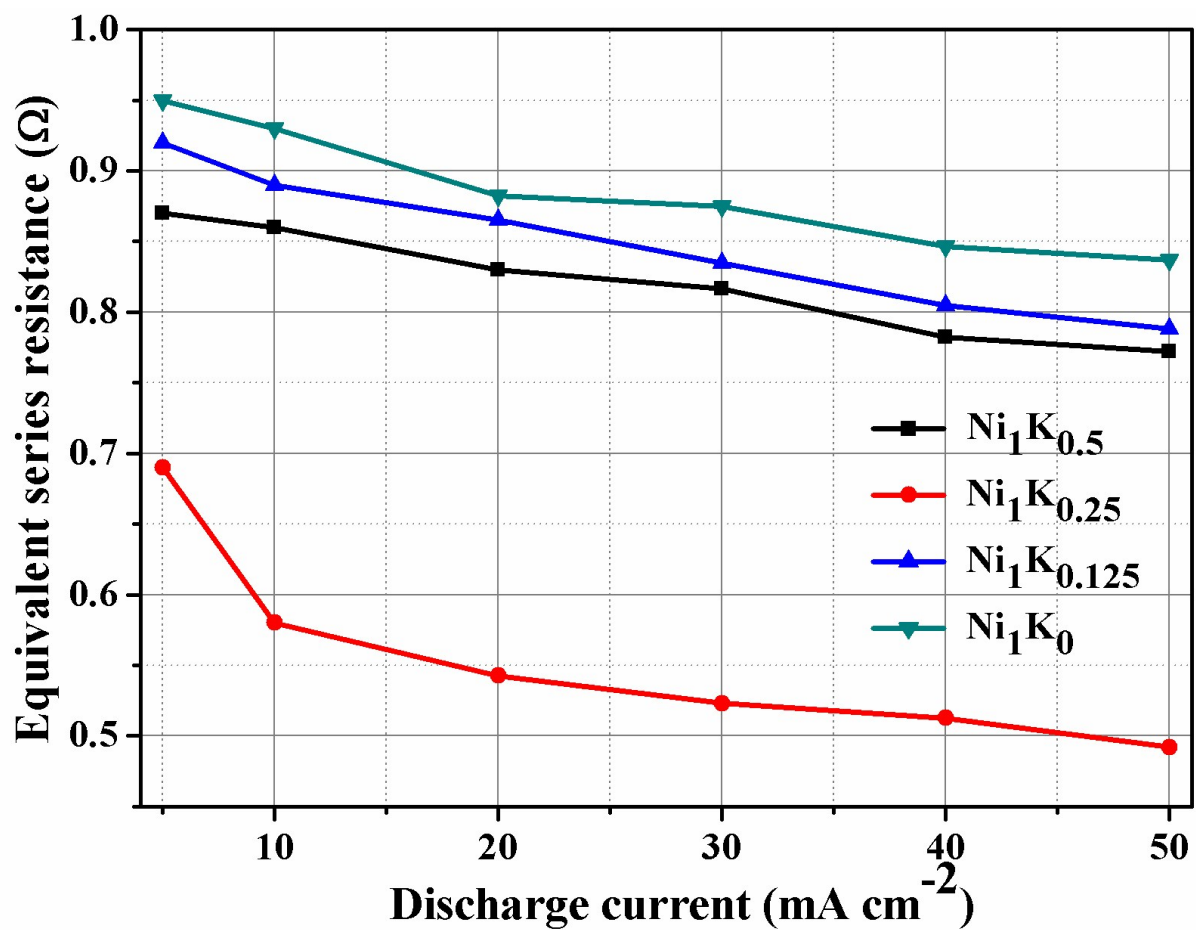

Fig.S8 ESR of Ni<sub>1</sub>K<sub>0.5</sub>, Ni<sub>1</sub>K<sub>0.25</sub>, Ni<sub>1</sub>K<sub>0.125</sub> and Ni<sub>1</sub>K<sub>0</sub> at current densities between 5 and 50 mA cm<sup>-2</sup>, respectively

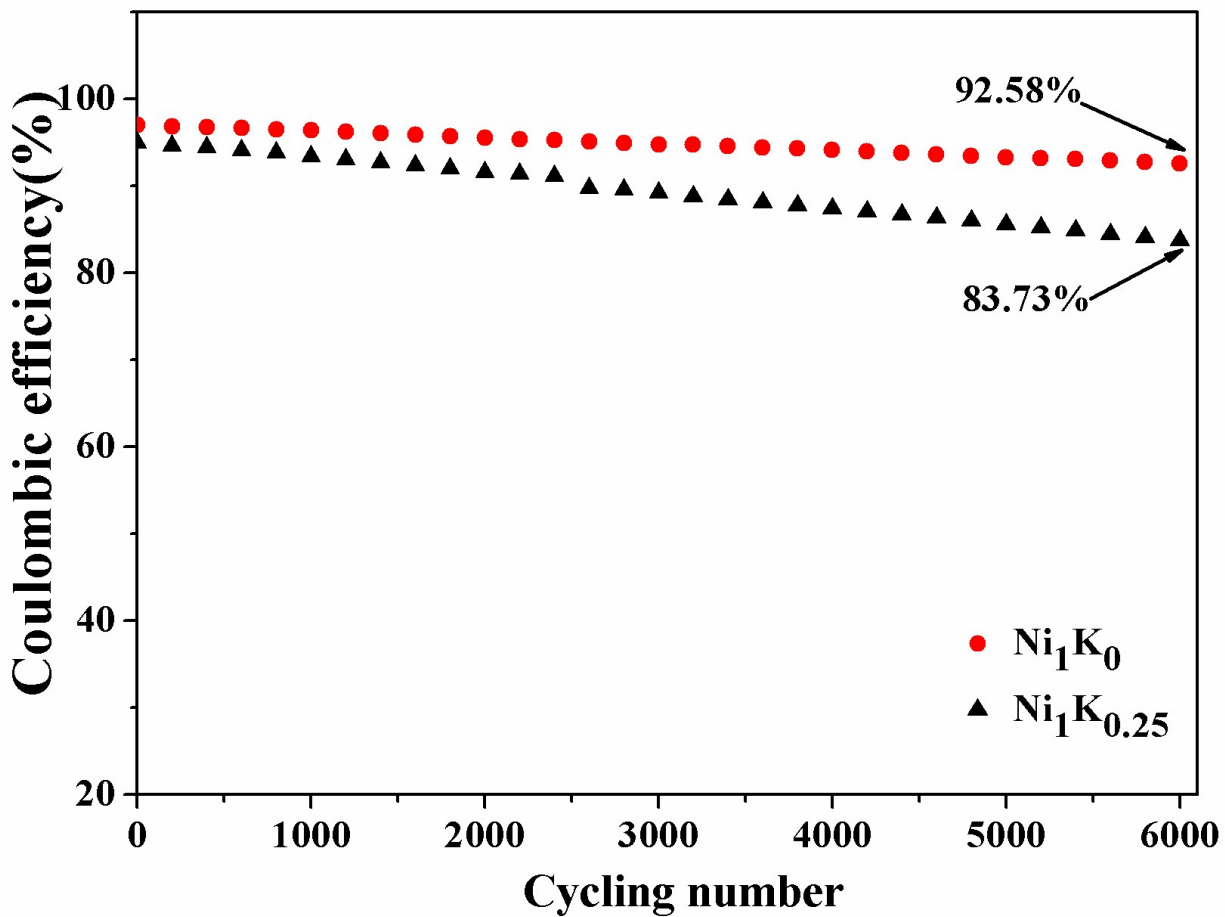

Fig.S9 Coulombic efficiency of  $\text{Ni}_1\text{K}_{0.25}$  and  $\text{Ni}_1\text{K}_0$  for 6000 cycles at  $10 \text{ mA cm}^{-2}$

Tab.S1 Literature survey for related NiCo<sub>2</sub>S<sub>4</sub>-based electrodes

| Samples                                                                         | Synthesis method          | Specific capacitance                               | Mass loading            |
|---------------------------------------------------------------------------------|---------------------------|----------------------------------------------------|-------------------------|
| NiCo <sub>2</sub> S <sub>4</sub> nanowire arrays <sup>38</sup>                  | Hydrothermal              | 4.1 F cm <sup>-2</sup> (10 mA cm <sup>-2</sup> )   | 2.5 mg cm <sup>-2</sup> |
| NiCo <sub>2</sub> S <sub>4</sub> nanotube arrays <sup>18</sup>                  | Hydrothermal              | 3.1 F cm <sup>-2</sup> (16.8 mA cm <sup>-2</sup> ) | 4.2 mg cm <sup>-2</sup> |
| NiCo <sub>2</sub> S <sub>4</sub> nanotube arrays <sup>15</sup>                  | Hydrothermal              | 2.86 F cm <sup>-2</sup> (4 mA cm <sup>-2</sup> )   | 4.3 mg cm <sup>-2</sup> |
| Urchin-like NiCo <sub>2</sub> S <sub>4</sub> nonastructure <sup>13</sup>        | Hydrothermal              | 2.30 F cm <sup>-2</sup> (2 mA cm <sup>-2</sup> )   | 4.2 mg cm <sup>-2</sup> |
| 3D cauliflower-like NiCo <sub>2</sub> S <sub>4</sub> architecture <sup>23</sup> | Microwave-assisted method | 7.355 F cm <sup>-2</sup> (5 mA cm <sup>-2</sup> )  | 5.0 mg cm <sup>-2</sup> |
| NiCo <sub>2</sub> S <sub>4</sub> nanoplate <sup>36</sup>                        | Hydrothermal              | 1.05 F cm <sup>-2</sup> (2.4 mA cm <sup>-2</sup> ) | 2.4 mg cm <sup>-2</sup> |
